# Supplementary material for: Health workers’ compliance to rapid diagnostic tests (RDTs) to guide malaria treatment: a systematic review and meta-analysis
Source: Malar J. 2016 Mar 15;15:163. doi: 10.1186/s12936-016-1218-5 (PMC4791859; doi:10.1186/s12936-016-1218-5)
Supplement: Supplementary file 2 — 10.1186/s12936-016-1218-5 Data extraction form. [file 12936_2016_1218_MOESM2_ESM.xls]

## Sheet: Appropriate Treatment
Author	Year	Country	Study setting	Study design	Outcome	Study population	Health personnel cadre	Number of HWs/clusters	RDT	Total	RDT+ Treated	RDT - treated	RDT + not treated	RDT- not treated		Number	Appropriate treatment	Positives treated	Negatives not treated
Bastiaens 2011	2011	Tanzania	N/A	Before and after	Secondary	Below 10 year olds	Clinicians	NR	ICT malaria Pf; Paracheck Pf	501	22	48	0	431		453	0.904192	1	0.899791
Batwala 2011	2011	Uganda	Both low and high transmission	Cluster randomised trial	Primary	All	Clinicians and nurses	30	Paracheck Pf	44565	22727	5110	0	16728		39455	0.885336	1	0.766004
Bisoffi	2009	Burkina Faso	Stable malaria with seasonal transmission	Randomsed clinical trial	Secondary	Above 6 months	Nurses	NR	Paracheck Pf	1050	543	400	13	94		637	0.606667	0.976619	0.190283
Bottiaeu 2013	2013	Mozambique	Perennial transmission with seasonal peaks	Observational	Primary	All	Clinicians	NR	Paracheck Pf; ICT Malaria Pf t; SD Malaria Antigen Pf	1385	368	72	19	926	Exclude unknowns	1294	0.934296	0.950904	0.927856
Chinkhumba 2010	2010	Malawi	Stable malaria with seasonal peak	Cross sectional	Secondary	Above 5 years	Clinicians and nurses	NR	ICT malaria pf; SD Bioline; Paracheck Pf; First Response	1390	985	162	20	223	RDT only	1208	0.869065	0.9801	0.579221
Hamer 2012	2012	Zambia	N/A	Cluster randomised trial	Secondary	Under 5 years	CHW	18	ICT malaria Pf	989	266	11	11	701		967	0.977755	0.960289	0.984551
Manyando 2014	2014	Zambia	Both low and high transmission	Observational	Primary	Under 5 years	Clinicians	NR	ICT malaria pf	1492	186	888	12	406		592	0.396783	0.939394	0.313756
Masanja 2010	2010	Tanzania	Holoendemic	Observational	Primary	Above 5 years	Clinicians	99	paraHIT	10650	5256	205	232	4957		10213	0.958967	0.957726	0.960287
Mbacham 2014a	2014	Cameroon	N/A	Cluster randomised	Primary	All	Clinicians	95	SD Bioline	1194	287	413	111	383		670	0.561139	0.721106	0.481156
Mbacham 2014b	2014	Cameroon	N/A	Cluster randomised		All	Clinicians	103	SD Bioline	1257	363	232	135	527		890	0.708035	0.728916	0.694335
Mukanga 2011	2011	Uganda	High transmission	Observational	Primary	Under 5 years	CHW	14	NR	182	137	1	5	39		176	0.967033	0.964789	0.975
Mbonye 2015	2015	Uganda	Perennial transmission	Cluster randomised trial	Primary	All	DSV	10	First Response	8073	4858	49	49	3117		7975	0.987861	0.990014	0.984523
Mubi 2013	2013	Tanzania	Perennial transmission with seasonal peaks	Cross sectional	Secondary	Above 3 months	Clinicians and nurses	20	NR	105	31	10	0	64		95	0.904762	1	0.864865
Mukanga 2012 (GH)	2012	Ghana	Seasonal	Cluster randomised	Secondary	6-59 months	CHW	16	Paracheck Pf	584	492	3	0	89		581	0.994863	1	0.967391
Mukanga 2012 (UG)	2012	Uganda	Stable malaria transmission	Cluster randomised		4-59 months	CHW	28	ICT malaria Pf	975	856	9	1	109	Excludes Burkina Faso	965	0.989744	0.998833	0.923729
Shakely 2013	2013	Zanzibar	Low transmission	Cross sectional	Primary	All	Clinicians and nurses	33	Paracheck Pf	3889	121	3	0	3765		3886	0.999229	1	0.999204
Uzochukwu 2011	2011	Nigeria	High transmission	Cross sectional	Primary	All	Clinicians, nurses and CHW	32	ICT malaria Pf	200	92	80	0	28		120	0.6	1	0.259259

## Sheet: Factors
Author	Country	Study setting	Study design	Data collection	Study population	Health personnel cadre	Patient factors	Positive Factors	Negative factors	Opportunity
Batwala 2011	Uganda		Cluster randomised trial		All	Clinical officers and nurses			High transmission
Bisoffi 2009	Burkina faso		Cluster randomised trial		All			Dry season associated with appropriate prescription; alternative diagnosis sought
Uzochukwu 2011	Nigeria		Cross sectional		All	Clinicians, nurses and CHW		Perceived effectiveness
Manyando	Zambia							No fever association
Mukanga 2012	Uganda							No association with socio-demographics
Mubi	Tanzania							help target treatment, confirm/rule out malaria, accurate/specific and patient satisfaction	False negative/inaccurate results (14/20; 70%), lack of trust by patients, negative results in patients with severe symptoms and invalid results
